# Supplementary material for: Characterization of flow recirculation zones at the Perdigão site using multi-lidar measurements
Source: Copernicus journal article supplement (doi:10.5194/acp-19-2713-2019), 2019-03-01
Supplement: Supplementary file 1 [file acp-19-2713-2019-supplement.zip]

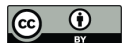

## *Supplement of*

# **Characterization of flow recirculation zones at the Perdigão site using multi-lidar measurements**

**Robert Menke et al.**

*Correspondence to:* Robert Menke (rmen@dtu.dk)

- [acp-19-2713-2019-supplement-title-page.pdf](#)
- [avalability.csv](#)
- [transect1.csv](#)
- [transect2.csv](#)
- [transect3.csv](#)

The copyright of individual parts of the supplement might differ from the CC BY 4.0 License.
